# Supplementary material for: Egr1 deficiency induces browning of inguinal subcutaneous white adipose tissue in mice
Source: PubMed Central journal article supplement (PMC5701004; doi:10.1038/s41598-017-16543-7), 2017-11-23
Supplement: 41598_2017_16543_MOESM1_ESM.pdf [file 41598_2017_16543_MOESM1_ESM.pdf]

## Supplementary information

### **Egr1 deficiency induces browning of inguinal subcutaneous white adipose tissue in mice**

Cécile Milet<sup>1\*\$</sup>, Marianne Bléher<sup>1§</sup>, Cassandra Allbright<sup>2</sup>, Mickael Orgeur<sup>1</sup>, Fanny Couplier<sup>3</sup>,  
Delphine Duprez<sup>1#\*</sup>, Emmanuelle Havis<sup>1#\*</sup>

<sup>1</sup> Sorbonne Universités, UPMC Univ Paris 06, CNRS UMR7622, Inserm U1156, IBPS-  
Developmental Biology Laboratory, F-75005 Paris, France.

<sup>2</sup> University of Pittsburgh, Pittsburgh, Pennsylvania, United States.

<sup>3</sup> École normale supérieure, PSL Research University, CNRS, Inserm, Institut de Biologie de  
l'École normale supérieure (IBENS), Plateforme Génomique, 75005 Paris, France.

<sup>§</sup> Co-first authors

<sup>#</sup> Co-senior authors

\* Corresponding authors:

Emmanuelle Havis, [emmanuelle.havis@upmc.fr](mailto:emmanuelle.havis@upmc.fr), +33 1 44 27 34 40

Delphine Duprez, [delphine.duprez@upmc.fr](mailto:delphine.duprez@upmc.fr), +33 1 44 27 27 53

**A****DAPI/Phase**1 month *Egr1*<sup>+/+</sup>**Ki67****Ki67/DAPI**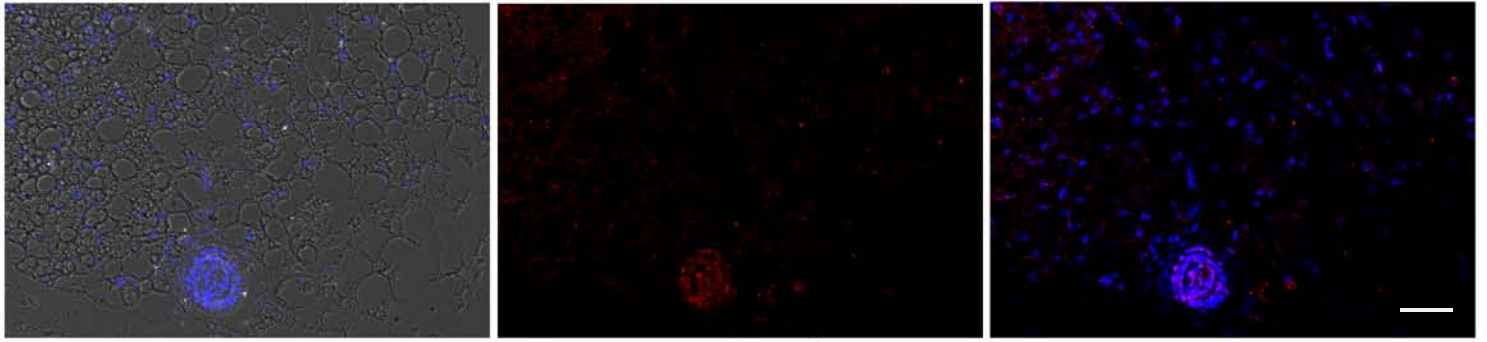**B****DAPI/Phase**1 month *Egr1*<sup>+/+</sup>**Ki67/DAPI**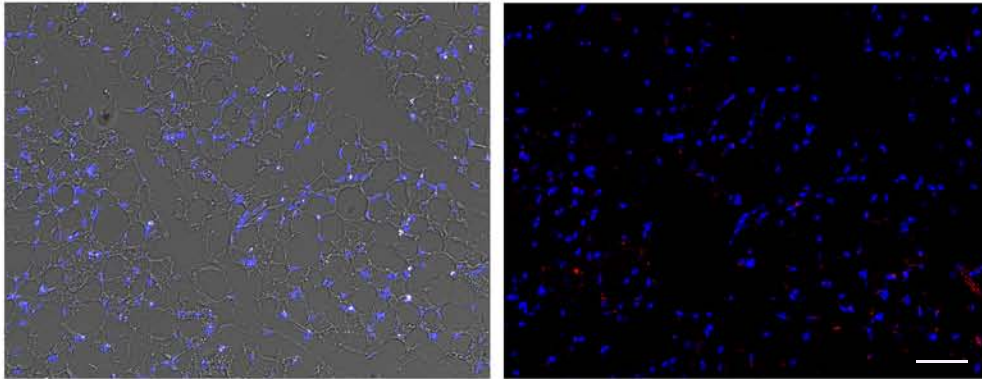**C****DAPI/Phase**1 month *Egr1*<sup>-/-</sup>**Ki67/DAPI**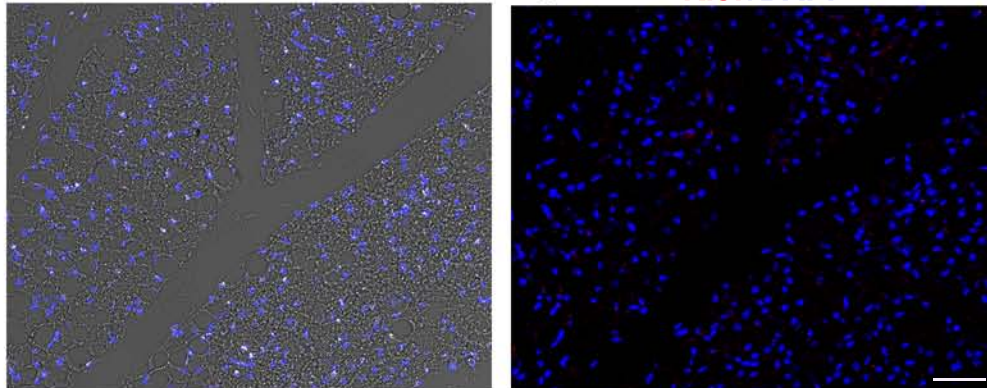**D****DAPI/Phase**4 months *Egr1*<sup>+/+</sup>**Ki67/DAPI**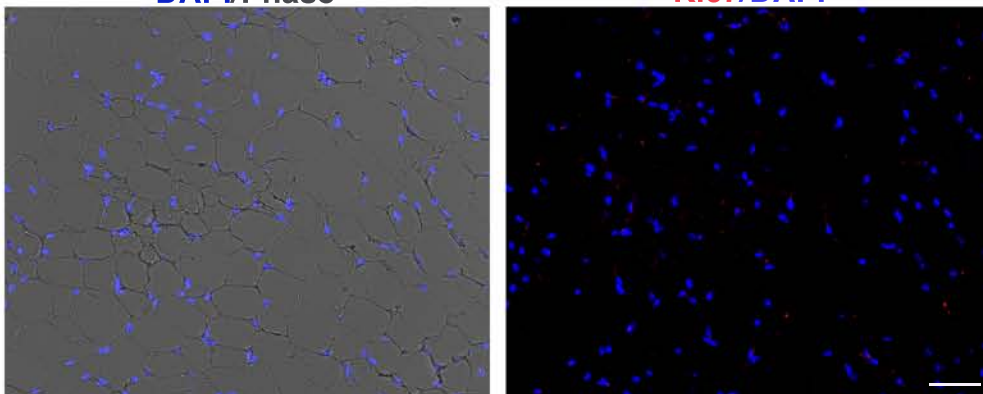**E****DAPI/Phase**4 months *Egr1*<sup>-/-</sup>**Ki67/DAPI**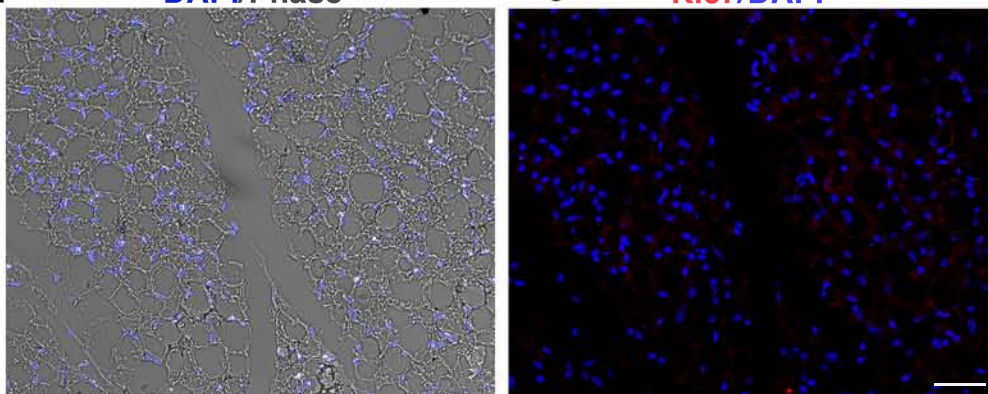

**A**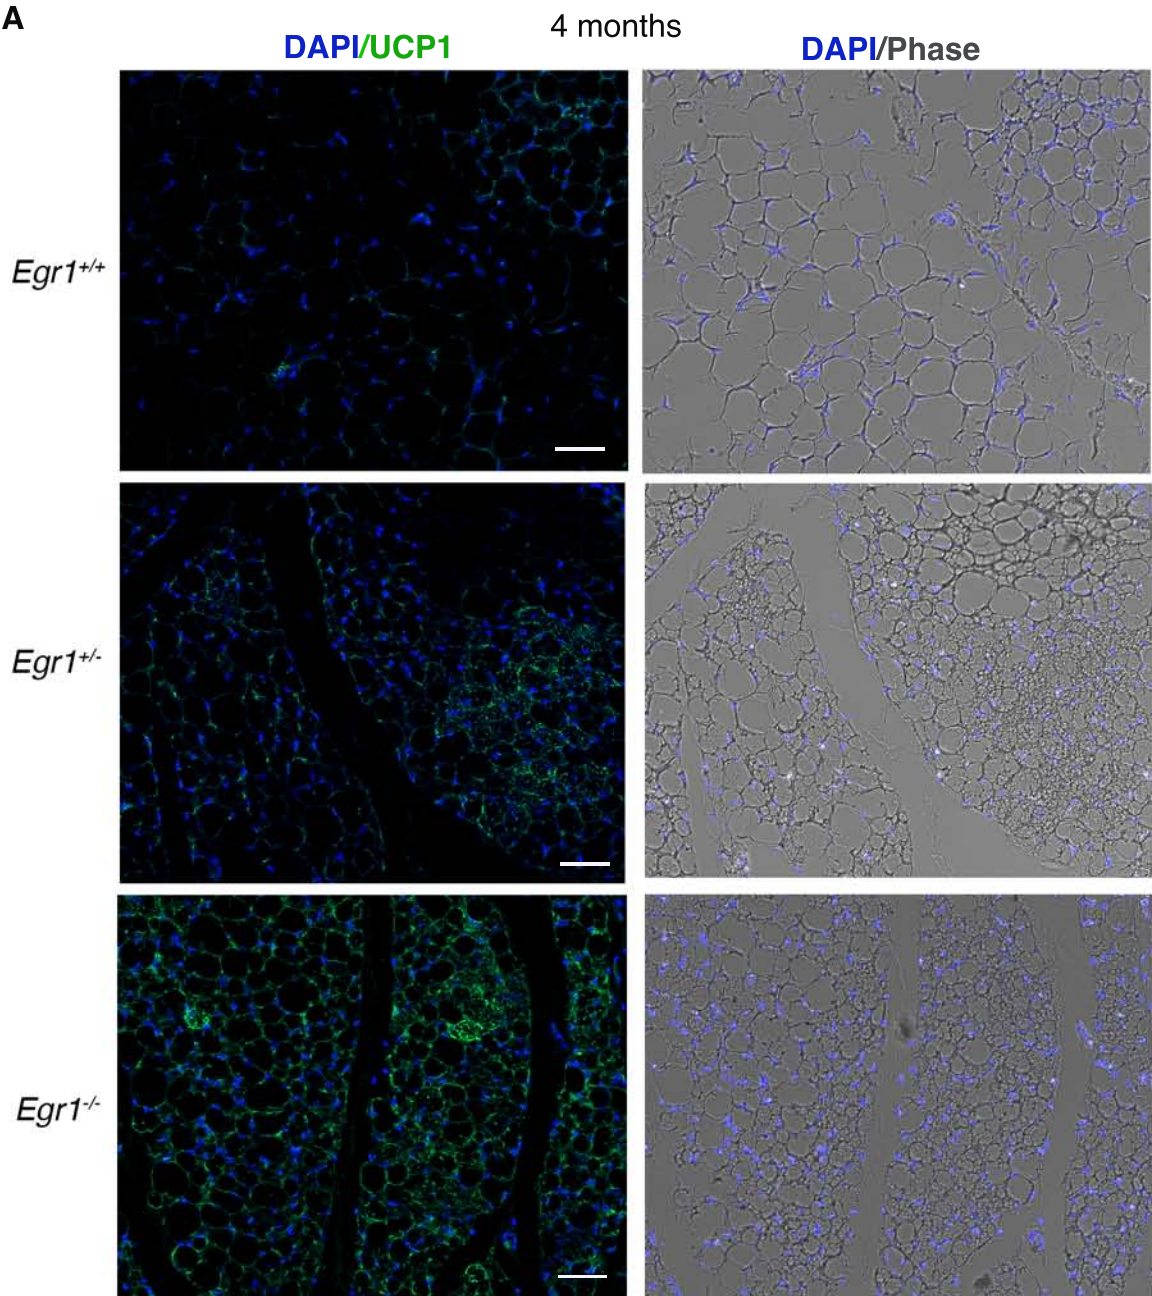**B** Number of beige and white adipocytes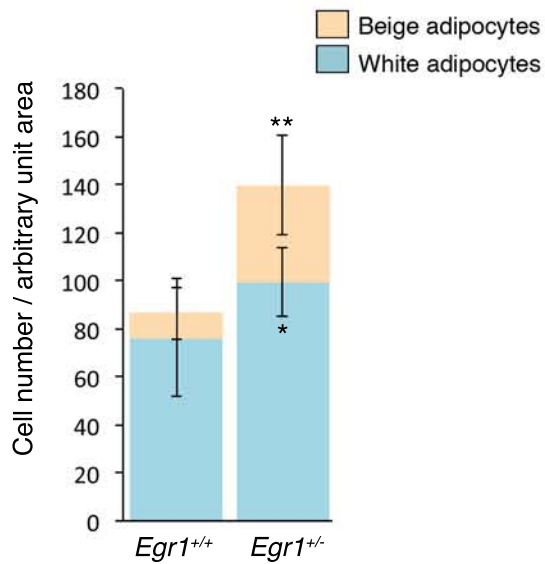**C** DAPI-stained cell counting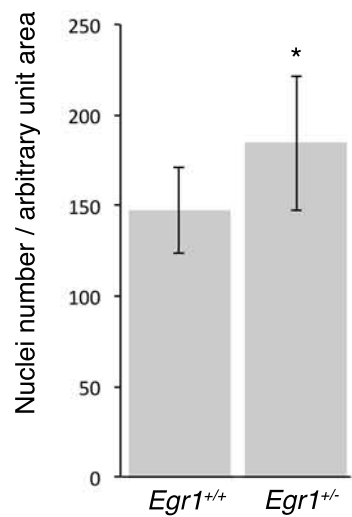

## List of up-regulated genes in the ingWAT of postnatal Egr1<sup>-/-</sup> mice

| Contig                                                                          | log2FoldChar | Fold Change | padj     | Description                                                                |
|---------------------------------------------------------------------------------|--------------|-------------|----------|----------------------------------------------------------------------------|
| <b><u>Genes expressed in adipose tissue derived- mesenchymal stem cells</u></b> |              |             |          |                                                                            |
| <i>Gnas</i>                                                                     | 0.471        | 1.386       | 3.94E-02 | GNAS (guanine nucleotide binding protein, alpha stimulating) complex locus |

### **Genes expressed during adipocytes (white/beige) differentiation**

|              |       |       |          |                                                  |
|--------------|-------|-------|----------|--------------------------------------------------|
| <i>Cebpb</i> | 0.583 | 1.498 | 2.03E-02 | CCAAT/enhancer binding protein (C/EBP), beta     |
| <i>Ppara</i> | 0.682 | 1.604 | 9.66E-03 | peroxisome proliferator activated receptor alpha |

### **Genes expressed in beige differentiated adipocytes: metabolism and thermogenic genes**

|                |       |       |          |                                                                             |
|----------------|-------|-------|----------|-----------------------------------------------------------------------------|
| <i>Acacb</i>   | 0.747 | 1.679 | 2.57E-03 | acetyl-Coenzyme A carboxylase beta                                          |
| <i>Acadm</i>   | 0.508 | 1.422 | 3.32E-02 | acyl-Coenzyme A dehydrogenase, medium chain                                 |
| <i>Acadvl</i>  | 0.504 | 1.418 | 3.47E-02 | acyl-Coenzyme A dehydrogenase, very long chain                              |
| <i>Aco2</i>    | 0.628 | 1.546 | 6.26E-03 | aconitase 2, mitochondrial                                                  |
| <i>Acot11</i>  | 1.171 | 2.251 | 1.92E-07 | acyl-CoA thioesterase 11                                                    |
| <i>Apoc1</i>   | 0.605 | 1.521 | 9.48E-03 | apolipoprotein C-I                                                          |
| <i>bscl2</i>   | 0.479 | 1.394 | 2.18E-02 | BSCL2, seipin lipid droplet biogenesis associated                           |
| <i>Chchd10</i> | 0.502 | 1.416 | 4.64E-02 | coiled-coil-helix-coiled-coil-helix domain containing 10                    |
| <i>Cidea</i>   | 0.818 | 1.763 | 6.35E-04 | cell death-inducing DNA fragmentation factor, alpha subunit-like effector A |
| <i>Cisd3</i>   | 0.664 | 1.584 | 1.91E-02 | CDGSH iron sulfur domain 3                                                  |
| <i>Clstn3</i>  | 0.725 | 1.653 | 1.78E-02 | calsyntenin 3                                                               |
| <i>Cluh</i>    | 0.552 | 1.466 | 1.01E-02 | clustered mitochondria (cluA/CLU1) homolog                                  |
| <i>Coq6</i>    | 0.684 | 1.607 | 4.08E-03 | coenzyme Q6 monooxygenase                                                   |
| <i>Cox5a</i>   | 0.694 | 1.618 | 2.10E-03 | cytochrome c oxidase subunit Va                                             |
| <i>Cox8b</i>   | 0.670 | 1.591 | 2.10E-03 | cytochrome c oxidase subunit VIIIb                                          |
| <i>Cpn2</i>    | 0.809 | 1.752 | 5.18E-03 | carboxypeptidase N, polypeptide 2                                           |
| <i>Cpt1b</i>   | 0.620 | 1.537 | 2.54E-02 | carnitine palmitoyltransferase 1b, muscle                                   |
| <i>Cs</i>      | 0.645 | 1.563 | 3.97E-03 | citrate synthase] [Gene Type: protein-coding]                               |
| <i>Cspg4</i>   | 0.563 | 1.478 | 2.63E-02 | chondroitin sulfate proteoglycan 4                                          |
| <i>Cyc1</i>    | 0.486 | 1.401 | 4.44E-02 | cytochrome c-1                                                              |
| <i>Dhrs11</i>  | 0.804 | 1.746 | 2.96E-03 | dehydrogenase/reductase (SDR family) member 11                              |

|                 |       |       |                                                                                  |
|-----------------|-------|-------|----------------------------------------------------------------------------------|
| <i>Dhrs9</i>    | 0.971 | 1.961 | 9.52E-04 dehydrogenase/reductase (SDR family) member 9                           |
| <i>Dio2</i>     | 1.421 | 2.677 | 4.63E-09 deiodinase, iodothyronine, type II                                      |
| <i>Elovl6</i>   | 0.536 | 1.450 | 4.30E-02 ELOVL family member 6, elongation of long chain fatty acids (yeast)]    |
| <i>Etfa</i>     | 0.525 | 1.439 | 2.03E-02 electron transferring flavoprotein, alpha polypeptide                   |
| <i>Etfdh</i>    | 0.506 | 1.420 | 3.34E-02 electron transferring flavoprotein, dehydrogenase                       |
| <i>Gpd1</i>     | 0.675 | 1.596 | 5.58E-03 glycerol-3-phosphate dehydrogenase 1 (soluble)                          |
| <i>Gpd2</i>     | 0.783 | 1.721 | 5.70E-04 glycerol phosphate dehydrogenase 2, mitochondrial                       |
| <i>Hadhb</i>    | 0.642 | 1.561 | 5.77E-03 hydroxyacyl-Coenzyme A dehydrogenase, beta subunit                      |
| <i>ldh3a</i>    | 0.586 | 1.501 | 1.02E-02 isocitrate dehydrogenase 3 (NAD+) alpha                                 |
| <i>ldh3g</i>    | 0.497 | 1.411 | 2.36E-02 isocitrate dehydrogenase 3 (NAD+), gamma                                |
| <i>Kcnk3</i>    | 0.625 | 1.543 | 1.13E-02 potassium channel, subfamily K, member 3                                |
| <i>Kng2</i>     | 0.785 | 1.723 | 8.74E-03 kininogen 2                                                             |
| <i>Ldhb</i>     | 0.719 | 1.646 | 2.83E-03 lactate dehydrogenase B                                                 |
| <i>Letmd1</i>   | 0.747 | 1.679 | 1.41E-03 LETM1 domain containing 1                                               |
| <i>Lrg1</i>     | 0.659 | 1.579 | 1.50E-02 leucine-rich alpha-2-glycoprotein 1                                     |
| <i>Mdh2</i>     | 0.565 | 1.479 | 1.62E-02 malate dehydrogenase 2, NAD (mitochondrial)                             |
| <i>Mecr</i>     | 0.547 | 1.461 | 1.04E-02 mitochondrial trans-2-enoyl-CoA reductase                               |
| <i>Mlxipl</i>   | 0.706 | 1.632 | 3.11E-03 MLX interacting protein-like                                            |
| <i>Mrap</i>     | 0.684 | 1.606 | 1.42E-03 melanocortin 2 receptor accessory protein                               |
| <i>Nampt</i>    | 0.678 | 1.600 | 1.42E-03 nicotinamide phosphoribosyltransferase                                  |
| <i>Nrg4</i>     | 0.454 | 1.370 | 2.75E-02 neuregulin 4                                                            |
| <i>Ntrk3</i>    | 0.619 | 1.536 | 8.33E-03 neurotrophic tyrosine kinase, receptor, type 3                          |
| <i>Nudt7</i>    | 0.494 | 1.409 | 4.56E-02 nudix (nucleoside diphosphate linked moiety X)-type motif 7             |
| <i>Ogdh</i>     | 0.653 | 1.572 | 2.81E-03 oxoglutarate (alpha-ketoglutarate) dehydrogenase (lipoamide)            |
| <i>Oplah</i>    | 0.563 | 1.477 | 7.75E-03 5-oxoprolinase (ATP-hydrolysing)                                        |
| <i>Otop1</i>    | 0.748 | 1.679 | 8.21E-04 otopetrin 1                                                             |
| <i>Pald1</i>    | 0.491 | 1.405 | 2.54E-02 phosphatase domain containing, paladin 1                                |
| <i>Pank1</i>    | 0.815 | 1.759 | 1.97E-04 pantothenate kinase 1                                                   |
| <i>Plin5</i>    | 0.817 | 1.762 | 1.46E-04 perilipin 5                                                             |
| <i>Pm20d1</i>   | 1.052 | 2.074 | 2.36E-04 peptidase M20 domain containing 1                                       |
| <i>Ppargc1a</i> | 0.870 | 1.827 | 6.30E-04 peroxisome proliferative activated receptor, gamma, coactivator 1 alpha |
| <i>Ppargc1b</i> | 0.792 | 1.732 | 3.45E-04 peroxisome proliferative activated receptor, gamma, coactivator 1 beta  |

|                 |       |       |          |                                                                                         |
|-----------------|-------|-------|----------|-----------------------------------------------------------------------------------------|
| <i>Ptp4a1</i>   | 0.445 | 1.362 | 3.55E-02 | protein tyrosine phosphatase 4a1                                                        |
| <i>Sh2b2</i>    | 0.621 | 1.538 | 5.44E-03 | SH2B adaptor protein 2                                                                  |
| <i>Slc25a20</i> | 0.540 | 1.454 | 3.06E-02 | solute carrier family 25 (mitochondrial carnitine/acylcarnitine translocase), member 20 |
| <i>Slc25a22</i> | 0.611 | 1.527 | 2.35E-02 | solute carrier family 25 (mitochondrial carrier, glutamate), member 22                  |
| <i>Slc25a42</i> | 0.860 | 1.815 | 1.26E-06 | solute carrier family 25, member 42                                                     |
| <i>Slc25a51</i> | 0.539 | 1.453 | 8.47E-03 | solute carrier family 25, member 51                                                     |
| <i>Slc36a2</i>  | 0.750 | 1.682 | 1.70E-04 | solute carrier family 36 (proton/amino acid symporter), member 2                        |
| <i>Slc4a4</i>   | 0.490 | 1.404 | 6.12E-03 | solute carrier family 4 (anion exchanger), member 4                                     |
| <i>Sucla2</i>   | 0.626 | 1.543 | 8.09E-03 | succinate-Coenzyme A ligase, ADP-forming, beta subunit                                  |
| <i>Suclg1</i>   | 0.541 | 1.455 | 2.33E-02 | succinate-CoA ligase, GDP-forming, alpha subunit]                                       |
| <i>Ucp1</i>     | 1.050 | 2.071 | 1.18E-07 | uncoupling protein 1 (mitochondrial, proton carrier)                                    |

### Genes expressed in White adipose metabolism

|                |       |       |          |                                                              |
|----------------|-------|-------|----------|--------------------------------------------------------------|
| <i>Adra1a</i>  | 1.056 | 2.079 | 2.95E-08 | adrenergic receptor, alpha 1a                                |
| <i>Adrbk2</i>  | 0.641 | 1.559 | 4.79E-03 | adrenergic, beta, receptor kinase 2                          |
| <i>Chst3</i>   | 0.588 | 1.503 | 4.61E-02 | carbohydrate (chondroitin 6/keratan) sulfotransferase 3      |
| <i>Cmtm4</i>   | 0.550 | 1.464 | 1.84E-02 | CKLF-like MARVEL transmembrane domain containing 4           |
| <i>Cntfr</i>   | 0.723 | 1.651 | 2.22E-02 | ciliary neurotrophic factor receptor                         |
| <i>Cntnap1</i> | 0.656 | 1.576 | 4.44E-02 | contactin associated protein-like 1                          |
| <i>Crat</i>    | 0.504 | 1.418 | 1.90E-02 | carnitine acetyltransferase                                  |
| <i>Ctse</i>    | 1.659 | 3.157 | 2.07E-10 | cathepsin E                                                  |
| <i>Dcun1d3</i> | 0.512 | 1.426 | 4.08E-02 | DCN1, defective in cullin neddylation 1, domain containing 3 |
| <i>Dgat2</i>   | 0.647 | 1.566 | 1.19E-02 | diacylglycerol O-acyltransferase 2                           |
| <i>Gk</i>      | 1.074 | 2.106 | 1.74E-09 | glycerol kinase                                              |
| <i>Gys1</i>    | 0.553 | 1.468 | 1.97E-02 | glycogen synthase 1, muscle                                  |
| <i>Helz2</i>   | 0.518 | 1.432 | 1.97E-02 | helicase with zinc finger 2, transcriptional coactivator     |
| <i>Hk2</i>     | 0.804 | 1.746 | 3.42E-04 | hexokinase 2                                                 |
| <i>Mif4gd</i>  | 0.509 | 1.423 | 3.01E-02 | MIF4G domain containing/serum leptin-interacting protein 1   |
| <i>Pdp2</i>    | 0.583 | 1.498 | 2.75E-02 | pyruvate dehydrogenase phosphatase catalytic subunit 2       |
| <i>Pnpla3</i>  | 0.819 | 1.764 | 6.72E-04 | patatin-like phospholipase domain containing 3               |
| <i>Ppip5k1</i> | 0.531 | 1.445 | 2.06E-02 | diphosphoinositol pentakisphosphate kinase 1                 |
| <i>Ppp1r10</i> | 0.462 | 1.377 | 4.01E-02 | protein phosphatase 1, regulatory subunit 10                 |

|                |       |       |          |                                   |
|----------------|-------|-------|----------|-----------------------------------|
| <i>Rtn4ip1</i> | 0.531 | 1.445 | 4.47E-02 | reticulon 4 interacting protein 1 |
| <i>Syt12</i>   | 0.777 | 1.714 | 1.13E-02 | synaptotagmin XII                 |
| <i>Tfrc</i>    | 1.189 | 2.280 | 1.18E-07 | transferrin receptor              |
| <i>Tysnd1</i>  | 0.553 | 1.467 | 4.20E-02 | trypsin domain containing 1       |

#### **Genes involved in inflammation in adipose tissue**

|                |       |       |          |                                                             |
|----------------|-------|-------|----------|-------------------------------------------------------------|
| <i>Cdkn1a</i>  | 0.654 | 1.574 | 3.55E-02 | cyclin-dependent kinase inhibitor 1A (P21)                  |
| <i>Ifit1</i>   | 0.795 | 1.735 | 2.54E-02 | interferon-induced protein with tetratricopeptide repeats 1 |
| <i>Il15ra</i>  | 0.483 | 1.398 | 3.95E-02 | interleukin 15 receptor, alpha chain                        |
| <i>Il2rb</i>   | 0.810 | 1.753 | 1.43E-02 | interleukin 2 receptor, beta chain                          |
| <i>Irf7</i>    | 0.702 | 1.626 | 2.54E-02 | interferon regulatory factor 7                              |
| <i>Tmem38b</i> | 0.501 | 1.415 | 4.29E-02 | transmembrane protein 38B                                   |
| <i>Tob1</i>    | 0.524 | 1.438 | 5.25E-03 | transducer of ErbB-2.1                                      |
| <i>Tob2</i>    | 0.698 | 1.623 | 2.79E-03 | transducer of ERBB2, 2                                      |
| <i>Traf4</i>   | 0.591 | 1.506 | 4.93E-02 | TNF receptor associated factor 4                            |
| <i>Usp2</i>    | 0.642 | 1.560 | 2.59E-02 | ubiquitin specific peptidase 2                              |

#### **Genes expressed in other cell types within the adipose tissue**

|                |       |       |          |                                                                                       |
|----------------|-------|-------|----------|---------------------------------------------------------------------------------------|
| <i>Adam11</i>  | 0.633 | 1.550 | 2.79E-02 | a disintegrin and metallopeptidase domain 11                                          |
| <i>Bst2</i>    | 0.705 | 1.630 | 3.55E-02 | bone marrow stromal cell antigen 2                                                    |
| <i>Cnnm2</i>   | 0.614 | 1.530 | 4.39E-02 | cyclin M2                                                                             |
| <i>Cd79a</i>   | 0.672 | 1.594 | 4.61E-02 | CD79A antigen                                                                         |
| <i>Cdh2</i>    | 0.611 | 1.527 | 1.73E-02 | cadherin 2                                                                            |
| <i>Csrnp1</i>  | 0.715 | 1.641 | 2.05E-02 | cysteine-serine-rich nuclear protein 1                                                |
| <i>Dlat</i>    | 0.505 | 1.419 | 3.96E-02 | dihydrolipoamide S-acetyltransferase (E2 component of pyruvate dehydrogenase complex) |
| <i>Dlst</i>    | 0.510 | 1.424 | 2.62E-02 | dihydrolipoamide S-succinyltransferase (E2 component of 2-oxo-glutarate complex)      |
| <i>Fggy</i>    | 0.717 | 1.644 | 1.35E-02 | FGGY carbohydrate kinase domain containing                                            |
| <i>Gramd1b</i> | 0.566 | 1.480 | 1.40E-02 | GRAM domain containing 1B                                                             |
| <i>Pax5</i>    | 0.687 | 1.610 | 3.11E-02 | paired box 5                                                                          |
| <i>Perm1</i>   | 0.712 | 1.638 | 1.05E-02 | PPARGC1 and ESRR induced regulator, muscle 1                                          |
| <i>Sbk1</i>    | 0.594 | 1.509 | 1.13E-02 | SH3-binding kinase 1                                                                  |
| <i>Sec61a2</i> | 0.536 | 1.450 | 1.90E-02 | Sec61, alpha subunit 2 ( <i>S. cerevisiae</i> )                                       |

*Trim67* 1.374 2.591 2.58E-11 tripartite motif-containing 67

**Genes with unidentified function or Non coding RNA**

|                      |       |       |                                                                                   |
|----------------------|-------|-------|-----------------------------------------------------------------------------------|
| <i>1110001J03Rik</i> | 0.744 | 1.675 | 5.77E-03                                                                          |
| <i>Ctcflos</i>       | 0.673 | 1.594 | 3.80E-03 CCCTC-binding factor (zinc finger protein)-like, opposite strand (ncRNA) |
| <i>Fam126b</i>       | 0.440 | 1.357 | 2.16E-02 family with sequence similarity 126, member B                            |
| <i>Fam210a</i>       | 0.507 | 1.422 | 2.96E-02 family with sequence similarity 210, member A                            |
| <i>Fam73b</i>        | 0.689 | 1.613 | 1.32E-03 family with sequence similarity 210, member A                            |
| <i>Gdap10</i>        | 0.950 | 1.932 | 8.41E-07 ganglioside-induced differentiation-associated-protein 10 (ncRNA)        |
| <i>Gm10032</i>       | 0.754 | 1.686 | 3.59E-02 predicted gene 10032 (ncRNA)                                             |
| <i>Gm37674</i>       | 0.680 | 1.603 | 3.98E-02 -                                                                        |
| <i>Gm37783</i>       | 0.725 | 1.653 | 2.14E-02 -                                                                        |
| <i>Gm38357</i>       | 0.680 | 1.602 | 1.22E-02 -                                                                        |
| <i>Gm42428</i>       | 0.765 | 1.699 | 1.23E-02 -                                                                        |
| <i>Gm42614</i>       | 0.944 | 1.924 | 1.42E-03 -                                                                        |
| <i>Gm42895</i>       | 0.741 | 1.671 | 2.52E-02 -                                                                        |
| <i>Gm43605</i>       | 0.772 | 1.707 | 2.14E-02 -                                                                        |
| <i>Gm8822</i>        | 2.452 | 5.473 | 5.82E-23 ARP3 actin-related protein 3 homolog pseudogene                          |
| <i>Gm9899</i>        | 0.668 | 1.589 | 1.98E-02 predicted gene 9899 (ncRNA)                                              |
| <i>RP23-82113.6</i>  | 0.813 | 1.757 | 1.34E-03 -                                                                        |



| GOTERM_BP_DIRECT                      | Up regulated genes in the inguinal subcutaneous adipose tissue of 2-week-old <i>Egr1</i> <sup>-/-</sup> mice |                                                                                                                                                                                                                                                                                                                                                                                                                                                                                                                                                                      |
|---------------------------------------|--------------------------------------------------------------------------------------------------------------|----------------------------------------------------------------------------------------------------------------------------------------------------------------------------------------------------------------------------------------------------------------------------------------------------------------------------------------------------------------------------------------------------------------------------------------------------------------------------------------------------------------------------------------------------------------------|
|                                       | Enrichment scores / P-values                                                                                 | Genes                                                                                                                                                                                                                                                                                                                                                                                                                                                                                                                                                                |
| <b>NADH Metabolic process</b>         | <b>95.2/ 3.3<sup>E</sup>-11</b>                                                                              | <i>Dlst</i> dihydrolipoamide S-succinyltransferase<br><i>Gpd2</i> glycerol phosphate dehydrogenase 2, mitochondrial<br><i>Gpd1</i> glycerol-3-phosphate dehydrogenase 1 (soluble)<br><i>Idh3a</i> isocitrate dehydrogenase 3 (NAD+) alpha<br><i>Idh3g</i> isocitrate dehydrogenase 3 (NAD+), gamma<br><i>Mdh2</i> malate dehydrogenase 2, NAD (mitochondrial)<br><i>Ogdh</i> oxoglutarate (alpha-ketoglutarate) dehydrogenase                                                                                                                                        |
| <b>Tricarboxylic acid cycle</b>       | <b>53.4/ 1.1<sup>E</sup>-13</b>                                                                              | <i>Aco2</i> aconitase 2, mitochondrial<br><i>Cs</i> citrate synthase<br><i>Dlat</i> dihydrolipoamide S-acetyltransferase<br><i>Dlst</i> dihydrolipoamide S-succinyltransferase<br><i>Idh3a</i> isocitrate dehydrogenase 3 (NAD+) alpha<br><i>Idh3g</i> isocitrate dehydrogenase 3 (NAD+), gamma<br><i>Mdh2</i> malate dehydrogenase 2, NAD (mitochondrial)<br><i>Ogdh</i> oxoglutarate (alpha-ketoglutarate) dehydrogenase<br><i>Suclg1</i> succinate-CoA ligase, GDP-forming, alpha subunit<br><i>Sucla2</i> succinate-Coenzyme A ligase, ADP-forming, beta subunit |
| <b>Brown fat cell differentiation</b> | <b>23.4 /5.7<sup>E</sup>-5</b>                                                                               | <i>Cebpb</i> CCAAT/enhancer binding protein (C/EBP), beta<br><i>Sh2b2</i> SH2B adaptor protein 2<br><i>Lrg1</i> leucine-rich alpha-2-glycoprotein 1<br><i>Mrap</i> melanocortin 2 receptor accessory protein<br><i>Nudt7</i> nudix -type motif 7<br><i>Ucp1</i> uncoupling protein 1                                                                                                                                                                                                                                                                                 |
| <b>Fatty acid metabolic process</b>   | <b>9.9 /7.1<sup>E</sup>-7</b>                                                                                | <i>Elovl6</i> elongation of long chain fatty acids, member 6<br><i>Acacb</i> acetyl-Coenzyme A carboxylase beta<br><i>Acot11</i> acyl-CoA thioesterase 11                                                                                                                                                                                                                                                                                                                                                                                                            |

|                                |                           |                                                                                                                                                                                                                                                                                                                                                                                                                                                                                                                                                                                                                                                                                                                                                                                                                                                                                                                                                             |
|--------------------------------|---------------------------|-------------------------------------------------------------------------------------------------------------------------------------------------------------------------------------------------------------------------------------------------------------------------------------------------------------------------------------------------------------------------------------------------------------------------------------------------------------------------------------------------------------------------------------------------------------------------------------------------------------------------------------------------------------------------------------------------------------------------------------------------------------------------------------------------------------------------------------------------------------------------------------------------------------------------------------------------------------|
|                                |                           | <p><i>Acadm</i> acyl-Coenzyme A dehydrogenase, medium chain<br/> <i>Acadvl</i> acyl-Coenzyme A dehydrogenase, very long chain<br/> <i>Crat</i> carnitine acetyltransferase<br/> <i>Cpt1b</i> carnitine palmitoyltransferase 1b<br/> <i>Hadhb</i> hydroxyacyl-Coenzyme A dehydrogenase<br/> <i>Mecr</i> mitochondrial trans-2-enoyl-CoA reductase<br/> <i>Ppara</i> peroxisome proliferator activated receptor alpha</p>                                                                                                                                                                                                                                                                                                                                                                                                                                                                                                                                     |
| <b>Metabolic process</b>       | 4.9/ 6 .9 <sup>E</sup> -7 | <p><i>Acacb</i> acetyl-Coenzyme A carboxylase beta<br/> <i>Aco2</i> aconitase 2, mitochondrial<br/> <i>Acadm</i> acyl-Coenzyme A dehydrogenase, medium chain<br/> <i>Acadvl</i> acyl-Coenzyme A dehydrogenase, very long chain<br/> <i>Dhrs11</i> dehydrogenase/reductase (SDR family) member 11<br/> <i>Dhrs9</i> dehydrogenase/reductase (SDR family) member 9<br/> <i>Dlat</i> dihydrolipoamide S-acetyltransferase<br/> <i>Dlst</i> dihydrolipoamide S-succinyltransferase<br/> <i>Gys1</i> glycogen synthase 1, muscle<br/> <i>Hk2</i> hexokinase 2<br/> <i>Hadhb</i> hydroxyacyl-Coenzyme A dehydrogenase<br/> <i>Ogdh</i> oxoglutarate (alpha-ketoglutarate) dehydrogenase<br/> <i>Pnpla3</i> patatin-like phospholipase domain containing 3<br/> <i>Pm20d1</i> peptidase M20 domain containing 1<br/> <i>Suclg1</i> succinate-CoA ligase, GDP-forming, alpha subunit)<br/> <i>Sucla2</i> succinate-Coenzyme A ligase, ADP-forming, beta subunit</p> |
| <b>Lipid metabolic process</b> | 4.7 /8.3 <sup>E</sup> -6  | <p><i>Bscl2</i> Berardinelli-Seip congenital lipodystrophy 2<br/> <i>Elovl6</i> elongation of long chain fatty acids, member 6<br/> <i>Acacb</i> acetyl-Coenzyme A carboxylase beta<br/> <i>Acadm</i> acyl-Coenzyme A dehydrogenase, medium chain<br/> <i>Acadvl</i> acyl-Coenzyme A dehydrogenase, very long chain)<br/> <i>Crat</i> carnitine acetyltransferase<br/> <i>Cpt1b</i> carnitine palmitoyltransferase 1b<br/> <i>Cidea</i> cell death-inducing DNA fragmentation factor, alpha subunit-like effector A</p>                                                                                                                                                                                                                                                                                                                                                                                                                                     |

|  |  |                                                                                                                                                                                                                                                                                  |
|--|--|----------------------------------------------------------------------------------------------------------------------------------------------------------------------------------------------------------------------------------------------------------------------------------|
|  |  | Dgat2 diacylglycerol O-acyltransferase 2<br>Hadhb hydroxyacyl-Coenzyme A dehydrogenase<br>Mecr mitochondrial trans-2-enoyl-CoA reductase<br>Pnpla3 patatin-like phospholipase domain containing 3<br>Plin5 perilipin 5<br>Ppara peroxisome proliferator activated receptor alpha |
|--|--|----------------------------------------------------------------------------------------------------------------------------------------------------------------------------------------------------------------------------------------------------------------------------------|

## List of down-regulated genes in the ingWAT of postnatal Egr1<sup>-/-</sup> mice

| Gene symbol                                                  | Log2 (Fold Change) | padj  | Description                                                                                            |
|--------------------------------------------------------------|--------------------|-------|--------------------------------------------------------------------------------------------------------|
| <b>Extracellular matrix, cytoskeleton and adhesion genes</b> |                    |       |                                                                                                        |
| <i>Adamts2</i>                                               | -0.488             | 0.713 | 3.83E-02 a disintegrin-like and metallopeptidase (reprolysin type) with thrombospondin type 1 motif, 2 |
| <i>Adamtsl4</i>                                              | -0.557             | 0.680 | 4.61E-02 ADAMTS-like 4                                                                                 |
| <i>Adgrd1</i>                                                | -0.617             | 0.652 | 3.91E-02 adhesion G protein-coupled receptor D1                                                        |
| <i>Adgre1</i>                                                | -0.622             | 0.650 | 1.23E-02 adhesion G protein-coupled receptor E1                                                        |
| <i>Antxr1</i>                                                | -0.520             | 0.697 | 1.51E-02 anthrax toxin receptor 1                                                                      |
| <i>Aspn</i>                                                  | -0.698             | 0.616 | 1.64E-03 asporin                                                                                       |
| <i>Apcdd1</i>                                                | -0.517             | 0.699 | 4.18E-02 adenomatosis polyposis coli down-regulated 1                                                  |
| <i>Cdh11</i>                                                 | -0.555             | 0.681 | 3.46E-02 cadherin 11                                                                                   |
| <i>Ckap4</i>                                                 | -0.552             | 0.682 | 2.14E-02 cytoskeleton-associated protein 4                                                             |
| <i>Col14a1</i>                                               | -0.692             | 0.619 | 2.01E-05 collagen, type XIV, alpha 1                                                                   |
| <i>Col1a1</i>                                                | -0.549             | 0.684 | 8.29E-03 collagen, type I, alpha 1                                                                     |
| <i>Col1a2</i>                                                | -0.522             | 0.696 | 8.78E-03 collagen, type I, alpha 2                                                                     |
| <i>Col3a1</i>                                                | -0.549             | 0.684 | 6.47E-03 collagen, type III, alpha 1                                                                   |
| <i>Col5a2</i>                                                | -0.598             | 0.661 | 1.95E-03 collagen, type V, alpha 2                                                                     |
| <i>Dab2</i>                                                  | -0.555             | 0.681 | 1.76E-02 disabled 2, mitogen-responsive phosphoprotein                                                 |
| <i>Dbn1</i>                                                  | -0.598             | 0.661 | 4.64E-02 drebrin 1                                                                                     |
| <i>Dcn</i>                                                   | -0.790             | 0.578 | 7.84E-06 decorin                                                                                       |
| <i>Ddr2</i>                                                  | -0.548             | 0.684 | 7.24E-03 discoidin domain receptor family, member 2                                                    |
| <i>Dpt</i>                                                   | -0.641             | 0.641 | 4.05E-03 dermatopontin                                                                                 |
| <i>Dpysl3</i>                                                | -0.669             | 0.629 | 1.08E-03 dihydropyrimidinase-like 3                                                                    |
| <i>Ecm2</i>                                                  | -0.541             | 0.688 | 3.83E-02 extracellular matrix protein 2, female organ and adipocyte specific                           |
| <i>Efemp1</i>                                                | -0.735             | 0.601 | 1.15E-03 epidermal growth factor-containing fibulin-like extracellular matrix protein 1                |
| <i>Fap</i>                                                   | -0.600             | 0.660 | 4.05E-03 fibroblast activation protein                                                                 |
| <i>Fbn1</i>                                                  | -0.781             | 0.582 | 7.58E-05 fibrillin 1                                                                                   |
| <i>Fmr1</i>                                                  | -0.504             | 0.705 | 2.61E-02 fragile X mental retardation syndrome 1                                                       |
| <i>Fn1</i>                                                   | -0.676             | 0.626 | 2.04E-04 fibronectin 1                                                                                 |
| <i>Fndc1</i>                                                 | -0.535             | 0.690 | 4.21E-02 fibronectin type III domain containing 1                                                      |
| <i>Itgbl1</i>                                                | -0.604             | 0.658 | 4.20E-02 integrin, beta-like 1                                                                         |

|                |        |       |                                                                   |
|----------------|--------|-------|-------------------------------------------------------------------|
| <i>Lum</i>     | -0.741 | 0.598 | 1.50E-05 lumican                                                  |
| <i>Mmp14</i>   | -0.478 | 0.718 | 3.95E-02 matrix metallopeptidase 14 (membrane-inserted)           |
| <i>Mmp2</i>    | -0.464 | 0.725 | 3.66E-02 matrix metallopeptidase 2]                               |
| <i>Mmp23</i>   | -0.630 | 0.646 | 8.69E-03 matrix metallopeptidase 23                               |
| <i>Pcdh20</i>  | -0.697 | 0.617 | 2.37E-02 protocadherin 20                                         |
| <i>Pcdhb14</i> | -0.749 | 0.595 | 5.51E-03 protocadherin beta 14                                    |
| <i>Pcolce2</i> | -0.771 | 0.586 | 4.73E-03 procollagen C-endopeptidase enhancer 2                   |
| <i>Postn</i>   | -0.615 | 0.653 | 1.21E-03 periostin, osteoblast specific factor                    |
| <i>Srpx2</i>   | -0.799 | 0.575 | 1.77E-03 sushi-repeat-containing protein, X-linked 2              |
| <i>Thbs3</i>   | -0.575 | 0.671 | 2.05E-02 thrombospondin 3                                         |
| <i>Timp2</i>   | -0.537 | 0.689 | 2.54E-02 tissue inhibitor of metalloproteinase 2                  |
| <i>Tppp3</i>   | -0.667 | 0.630 | 1.26E-02 tubulin polymerization-promoting protein family member 3 |
| <i>Vcan</i>    | -0.646 | 0.639 | 1.13E-02 versican                                                 |
| <i>Vnn3</i>    | -0.663 | 0.632 | 1.94E-02 vanin 3                                                  |

**Genes involved in adipose tissue metabolism and adipocyte metabolism (cell signalling/cell cycle/transcription)**

|                |        |       |                                                                             |
|----------------|--------|-------|-----------------------------------------------------------------------------|
| <i>Aebp1</i>   | -0.710 | 0.611 | 2.34E-04 Adipocyte Enhancer binding protein 1                               |
| <i>Akr1c14</i> | -0.858 | 0.552 | 8.06E-04 aldo-keto reductase family 1, member C14                           |
| <i>Akr1c18</i> | -0.921 | 0.528 | 1.21E-04 aldo-keto reductase family 1, member C18                           |
| <i>Alb</i>     | -0.734 | 0.601 | 3.66E-03 albumin                                                            |
| <i>Aldh1a3</i> | -0.752 | 0.594 | 2.10E-03 aldehyde dehydrogenase family 1, subfamily A3                      |
| <i>Atp2b4</i>  | -0.494 | 0.710 | 2.54E-02 ATPase, Ca <sup>++</sup> transporting, plasma membrane 4           |
| <i>Atpif1</i>  | -0.513 | 0.701 | 1.98E-02 ATPase inhibitory factor 1                                         |
| <i>Casp1</i>   | -0.667 | 0.630 | 3.32E-02 caspase 1                                                          |
| <i>Ces1f</i>   | -0.635 | 0.644 | 2.05E-03 Carboxylesterase 1F                                                |
| <i>Clec3b</i>  | -0.711 | 0.611 | 8.48E-03 C-type lectin domain family 3, member b                            |
| <i>Cyb5r3</i>  | -0.659 | 0.633 | 3.79E-03 cytochrome b5 reductase 3                                          |
| <i>Cygb</i>    | -0.532 | 0.692 | 2.01E-02 cytoglobin                                                         |
| <i>Dnm1</i>    | -0.633 | 0.645 | 8.04E-03 dynamin 1                                                          |
| <i>Gas7</i>    | -0.735 | 0.601 | 1.91E-04 growth arrest specific 7                                           |
| <i>Gatm</i>    | -0.537 | 0.689 | 3.59E-02 glycine amidinotransferase (L-arginine:glycine amidinotransferase) |
| <i>Ggh</i>     | -0.605 | 0.658 | 4.70E-03 gamma-glutamyl hydrolase                                           |

|                |        |       |                                                                                                       |
|----------------|--------|-------|-------------------------------------------------------------------------------------------------------|
| <i>Ghr</i>     | -0.596 | 0.662 | 3.79E-03 growth hormone receptor                                                                      |
| <i>Glb1l2</i>  | -0.507 | 0.704 | 4.59E-03 galactosidase, beta 1-like 2                                                                 |
| <i>Gnai1</i>   | -0.472 | 0.721 | 3.65E-02 guanine nucleotide binding protein (G protein), alpha inhibiting 1                           |
| <i>Gpc3</i>    | -0.487 | 0.714 | 3.25E-02 glypican 3                                                                                   |
| <i>Gulp1</i>   | -0.528 | 0.693 | 3.52E-02 GULP, engulfment adaptor PTB domain containing 1]                                            |
| <i>Hmgn3</i>   | -0.683 | 0.623 | 1.97E-02 high mobility group nucleosomal binding domain 3                                             |
| <i>Kdelr3</i>  | -0.670 | 0.629 | 1.56E-02 KDEL (Lys-Asp-Glu-Leu) endoplasmic reticulum protein retention receptor 3                    |
| <i>Klf14</i>   | -1.097 | 0.468 | 2.34E-04 Kruppel-like factor 14                                                                       |
| <i>Khl13</i>   | -0.755 | 0.592 | 2.40E-04 kelch-like 13                                                                                |
| <i>Lpar1</i>   | -0.578 | 0.670 | 4.70E-03 lysophosphatidic acid receptor 1                                                             |
| <i>Lrrc17</i>  | -0.727 | 0.604 | 4.94E-04 leucine rich repeat containing 17                                                            |
| <i>Lrrn4cl</i> | -0.752 | 0.594 | 1.56E-03 LRRN4 C-terminal like                                                                        |
| <i>Mcm6</i>    | -0.593 | 0.663 | 1.50E-02 minichromosome maintenance complex component 6                                               |
| <i>Mfap2</i>   | -0.841 | 0.558 | 3.58E-03 microfibrillar-associated protein 2                                                          |
| <i>Mfap4</i>   | -0.832 | 0.562 | 1.69E-03 microfibrillar-associated protein 4                                                          |
| <i>Morf4l2</i> | -0.480 | 0.717 | 2.85E-02 mortality factor 4 like 2                                                                    |
| <i>Mpz</i>     | -0.558 | 0.679 | 3.91E-02 myelin protein zero                                                                          |
| <i>Mrc1</i>    | -0.615 | 0.653 | 3.79E-03 mannose receptor, C type 1                                                                   |
| <i>Mrc2</i>    | -0.484 | 0.715 | 3.23E-02 mannose receptor, C type 2                                                                   |
| <i>Nr5a2</i>   | -0.721 | 0.607 | 2.01E-02 nuclear receptor subfamily 5, group A, member 2                                              |
| <i>Nrk</i>     | -0.733 | 0.601 | 3.11E-03 Nik related kinase                                                                           |
| <i>Nxnl1</i>   | -0.757 | 0.592 | 2.05E-02 nucleoredoxin-like 1                                                                         |
| <i>Olfml1</i>  | -0.746 | 0.596 | 2.38E-03 olfactomedin-like 1                                                                          |
| <i>Olfml2b</i> | -0.654 | 0.636 | 1.57E-02 olfactomedin-like 2B                                                                         |
| <i>Opcml</i>   | -0.716 | 0.609 | 5.75E-03 opioid binding protein/cell adhesion molecule-like                                           |
| <i>P4hb</i>    | -0.433 | 0.741 | 2.22E-02 prolyl 4-hydroxylase, beta polypeptide                                                       |
| <i>Palm</i>    | -0.509 | 0.703 | 4.28E-02 paralemmin                                                                                   |
| <i>Peg10</i>   | -0.696 | 0.617 | 2.35E-02 paternally expressed 10                                                                      |
| <i>Pi15</i>    | -0.614 | 0.653 | 5.75E-03 peptidase inhibitor 15                                                                       |
| <i>Pi16</i>    | -0.632 | 0.645 | 2.98E-02 peptidase inhibitor 16                                                                       |
| <i>Plekha4</i> | -0.746 | 0.596 | 8.18E-04 pleckstrin homology domain containing, family A (phosphoinositide binding specific) member 4 |
| <i>Plscr4</i>  | -0.743 | 0.598 | 5.77E-03 phospholipid scramblase 4                                                                    |

|                |        |       |                                                                                                      |
|----------------|--------|-------|------------------------------------------------------------------------------------------------------|
| <i>Plxdc2</i>  | -0.624 | 0.649 | 5.96E-04 plexin domain containing 2                                                                  |
| <i>Ptgfrn</i>  | -0.761 | 0.590 | 1.12E-04 prostaglandin F2 receptor negative regulator                                                |
| <i>Qpct</i>    | -0.739 | 0.599 | 2.36E-03 glutaminyl-peptide cyclotransferase (glutaminyl cyclase)                                    |
| <i>Rab3il1</i> | -0.556 | 0.680 | 4.84E-02 RAB3A interacting protein (rabin3)-like 1                                                   |
| <i>Rab7b</i>   | -0.763 | 0.589 | 2.10E-03 RAB7B, member RAS oncogene family                                                           |
| <i>Rassf8</i>  | -0.441 | 0.737 | 3.24E-02 Ras association (RalGDS/AF-6) domain family (N-terminal) member 8                           |
| <i>Rcan2</i>   | -0.716 | 0.609 | 7.24E-03 regulator of calcineurin 2                                                                  |
| <i>Rcn1</i>    | -0.567 | 0.675 | 2.99E-03 reticulocalbin 1                                                                            |
| <i>Rcn3</i>    | -0.582 | 0.668 | 3.00E-02 reticulocalbin 3, EF-hand calcium binding domain                                            |
| <i>Rnase4</i>  | -0.589 | 0.665 | 2.81E-02 ribonuclease, RNase A family 4                                                              |
| <i>S100a10</i> | -0.487 | 0.714 | 3.46E-02 S100 calcium binding protein A10 (calpactin)                                                |
| <i>S100a6</i>  | -0.584 | 0.667 | 2.54E-02 S100 calcium binding protein A6 (calcyclin)                                                 |
| <i>Scara5</i>  | -0.585 | 0.667 | 1.97E-02 scavenger receptor class A, member 5                                                        |
| <i>Sh3d19</i>  | -0.509 | 0.703 | 2.47E-02 SH3 domain protein D19                                                                      |
| <i>Slc5a3</i>  | -0.692 | 0.619 | 5.61E-03 solute carrier family 5 (inositol transporters), member 3                                   |
| <i>Smarca1</i> | -0.685 | 0.622 | 1.61E-02 SWI/SNF related, matrix associated, actin dependent regulator of chromatin, subfamily a, m1 |
| <i>Sncg</i>    | -0.889 | 0.540 | 1.12E-04 synuclein, gamma                                                                            |
| <i>Srpx2</i>   | -0.799 | 0.575 | 1.77E-03 sushi-repeat-containing protein, X-linked 2                                                 |
| <i>Tceal8</i>  | -0.585 | 0.667 | 7.35E-03 transcription elongation factor A (SII)-like 8                                              |
| <i>Tmeff2</i>  | -0.610 | 0.655 | 2.47E-02 transmembrane protein with EGF-like and two follistatin-like domains 2                      |
| <i>Tmem100</i> | -0.969 | 0.511 | 1.29E-04 transmembrane protein 100                                                                   |
| <i>Tpsb2</i>   | -0.691 | 0.620 | 4.72E-02 tryptase beta 2                                                                             |
| <i>Ugdh</i>    | -0.575 | 0.672 | 1.23E-02 UDP-glucose dehydrogenase                                                                   |
| <i>Ugt8a</i>   | -0.662 | 0.632 | 6.15E-03 UDP galactosyltransferase 8A                                                                |

#### **Genes involved in adipocytes differentiation**

|                 |        |       |                                                                     |
|-----------------|--------|-------|---------------------------------------------------------------------|
| <i>Ahnak2</i>   | -0.684 | 0.623 | 2.46E-03 AHNAK nucleoprotein 2                                      |
| <i>Arhgef25</i> | -0.561 | 0.678 | 2.33E-02 Rho guanine nucleotide exchange factor (GEF) 25            |
| <i>Camk2n1</i>  | -0.589 | 0.665 | 4.21E-02 calcium/calmodulin-dependent protein kinase II inhibitor 1 |
| <i>Cdkn1c</i>   | -0.592 | 0.663 | 4.51E-03 cyclin-dependent kinase inhibitor 1C (P57)                 |
| <i>Ctsk</i>     | -0.636 | 0.643 | 7.85E-03 cathepsin K                                                |
| <i>Ctsl</i>     | -0.434 | 0.740 | 3.01E-02 cathepsin L                                                |

|              |        |       |                                                           |
|--------------|--------|-------|-----------------------------------------------------------|
| <i>Eid1</i>  | -0.489 | 0.712 | 3.65E-02 EP300 interacting inhibitor of differentiation 1 |
| <i>Ffar2</i> | -0.624 | 0.649 | 6.28E-03 free fatty acid receptor 2                       |
| <i>Medag</i> | -0.615 | 0.653 | 1.13E-02 mesenteric estrogen dependent adipogenesis       |
| <i>Pros1</i> | -0.448 | 0.733 | 4.44E-02 protein S (alpha)                                |
| <i>Prrx1</i> | -0.492 | 0.711 | 3.04E-02 paired related homeobox 1                        |

**Genes involved in inflammation, immune response or expressed in blood cells**

|                |        |       |                                                          |
|----------------|--------|-------|----------------------------------------------------------|
| <i>Aif1l</i>   | -0.665 | 0.631 | 1.88E-02 allograft inflammatory factor 1-like            |
| <i>Akap12</i>  | -0.681 | 0.624 | 2.79E-03 A kinase (PRKA) anchor protein (gravin) 12      |
| <i>Alcam</i>   | -0.513 | 0.701 | 1.62E-02 activated leukocyte cell adhesion molecule      |
| <i>Anxa1</i>   | -0.603 | 0.658 | 1.58E-02 annexin A1                                      |
| <i>Anxa3</i>   | -0.505 | 0.704 | 2.75E-02 annexin A3                                      |
| <i>C1qtnf7</i> | -0.767 | 0.588 | 5.88E-03 C1q and tumor necrosis factor related protein 7 |
| <i>C3ar1</i>   | -0.611 | 0.655 | 2.59E-02 complement component 3a receptor 1              |
| <i>Car8</i>    | -0.700 | 0.616 | 6.74E-03 carbonic anhydrase 8                            |
| <i>Cd209f</i>  | -0.825 | 0.564 | 2.79E-03 CD209f antigen                                  |
| <i>Cd248</i>   | -0.839 | 0.559 | 3.42E-04 CD248 antigen, endosialin                       |
| <i>Cd34</i>    | -0.625 | 0.649 | 3.35E-03 CD34 antigen                                    |
| <i>Cfh</i>     | -0.825 | 0.565 | 3.42E-04 complement component factor h                   |
| <i>Cma1</i>    | -0.744 | 0.597 | 7.75E-03 chymase 1, mast cell                            |
| <i>Commd1</i>  | -0.559 | 0.679 | 3.57E-02 COMM domain containing 1                        |
| <i>Cp</i>      | -0.748 | 0.596 | 1.36E-03 ceruloplasmin                                   |
| <i>Cpa3</i>    | -0.626 | 0.648 | 3.68E-02 carboxypeptidase A3, mast cell                  |
| <i>Dse</i>     | -0.548 | 0.684 | 1.50E-02 dermatan sulfate epimerase                      |
| <i>Efhd1</i>   | -0.704 | 0.614 | 1.19E-02 EF hand domain containing 1                     |
| <i>Emilin2</i> | -0.609 | 0.656 | 2.00E-02 elastin microfibril interfacier 2               |
| <i>F13a1</i>   | -0.695 | 0.618 | 4.99E-03 coagulation factor XIII, A1 subunit             |
| <i>Fcgr3</i>   | -0.626 | 0.648 | 2.01E-02 Fc receptor, IgG, low affinity III              |
| <i>Fcrls</i>   | -0.786 | 0.580 | 1.13E-02 Fc receptor-like S, scavenger receptor]         |
| <i>Folr2</i>   | -0.812 | 0.570 | 6.29E-03 folate receptor 2 (fetal)                       |
| <i>Frm4b</i>   | -0.498 | 0.708 | 3.51E-02 FERM domain containing 4B]                      |
| <i>Hba-a1</i>  | -0.694 | 0.618 | 9.93E-03 hemoglobin alpha, adult chain 1                 |



|                  |        |       |                                                                        |
|------------------|--------|-------|------------------------------------------------------------------------|
| <i>Il1rl2</i>    | -0.549 | 0.683 | 3.59E-02 interleukin 1 receptor-like 2                                 |
| <i>Mal</i>       | -0.582 | 0.668 | 4.44E-02 myelin and lymphocyte protein, T cell differentiation protein |
| <i>Morc4</i>     | -0.619 | 0.651 | 2.11E-02 microrchidia 4                                                |
| <i>Pf4</i>       | -0.730 | 0.603 | 6.34E-03 platelet factor 4                                             |
| <i>Plat</i>      | -0.716 | 0.609 | 2.10E-03 plasminogen activator, tissue                                 |
| <i>Ppic</i>      | -0.551 | 0.682 | 1.46E-02 peptidylprolyl isomerase C                                    |
| <i>Prnp</i>      | -0.468 | 0.723 | 3.47E-02 prion protein                                                 |
| <i>Serpinb6a</i> | -0.684 | 0.622 | 5.76E-04 serine (or cysteine) peptidase inhibitor, clade B, member 6a  |
| <i>Serpinf1</i>  | -0.556 | 0.680 | 1.43E-02 serine (or cysteine) peptidase inhibitor, clade F, member 1   |
| <i>Sulf1</i>     | -0.532 | 0.692 | 1.61E-02 sulfatase 1                                                   |
| <i>Wbp5</i>      | -0.683 | 0.623 | 2.34E-04 WW domain binding protein 5                                   |

#### **Genes encoding secreted molecules**

|                 |        |       |                                                                                                 |
|-----------------|--------|-------|-------------------------------------------------------------------------------------------------|
| <i>Bmp3</i>     | -0.633 | 0.645 | 4.01E-02 bone morphogenetic protein 3                                                           |
| <i>Ccdc80</i>   | -0.849 | 0.555 | 1.09E-04 coiled-coil domain containing 80                                                       |
| <i>Chrdl1</i>   | -0.891 | 0.539 | 1.20E-04 chordin-like 1                                                                         |
| <i>Crispld1</i> | -0.709 | 0.612 | 6.15E-03 cysteine-rich secretory protein LCCL domain containing 1                               |
| <i>Fgf2</i>     | -0.576 | 0.671 | 1.56E-02 fibroblast growth factor 2                                                             |
| <i>Fstl1</i>    | -0.762 | 0.590 | 1.73E-04 follistatin-like 1                                                                     |
| <i>Igf1</i>     | -0.710 | 0.611 | 2.04E-04 insulin-like growth factor 1                                                           |
| <i>Igf2</i>     | -0.719 | 0.608 | 1.08E-03 insulin-like growth factor 2                                                           |
| <i>Igfbp5</i>   | -0.511 | 0.702 | 2.00E-02 insulin-like growth factor binding protein 5                                           |
| <i>Igfbp6</i>   | -0.777 | 0.583 | 5.58E-03 insulin-like growth factor binding protein 6                                           |
| <i>Lep</i>      | -0.507 | 0.704 | 2.18E-02 leptin                                                                                 |
| <i>Nucb2</i>    | -0.607 | 0.657 | 5.82E-03 nucleobindin 2                                                                         |
| <i>Rarres2</i>  | -0.610 | 0.655 | 1.97E-02 retinoic acid receptor responder (tazarotene induced) 2                                |
| <i>Retnla</i>   | -0.779 | 0.583 | 5.44E-03 resistin like alpha                                                                    |
| <i>Sema3b</i>   | -0.605 | 0.658 | 1.88E-02 sema domain, immunoglobulin domain (Ig), short basic domain, secreted, (semaphorin) 3B |
| <i>Sema3d</i>   | -0.677 | 0.625 | 2.55E-03 sema domain, immunoglobulin domain (Ig), short basic domain, secreted, (semaphorin) 3D |
| <i>Sfrp2</i>    | -0.796 | 0.576 | 2.10E-03 secreted frizzled-related protein 2                                                    |
| <i>Sfrp4</i>    | -1.293 | 0.408 | 3.35E-08 secreted frizzled-related protein 4                                                    |
| <i>Smoc1</i>    | -0.542 | 0.687 | 1.18E-02 SPARC related modular calcium binding 1                                                |

|              |        |       |                                                              |
|--------------|--------|-------|--------------------------------------------------------------|
| <i>Sparc</i> | -0.490 | 0.712 | 2.03E-02 secreted acidic cysteine rich glycoprotein          |
| <i>Wnt2</i>  | -0.711 | 0.611 | 2.35E-02 wntless-type MMTV integration site family, member 2 |

**Genes with unidentified function in the adipose tissue and non coding RNAs**

|                   |        |       |                                                                       |
|-------------------|--------|-------|-----------------------------------------------------------------------|
| <i>AW551984</i>   | -0.645 | 0.640 | 4.93E-02 expressed sequence AW551984                                  |
| <i>Bcas1</i>      | -0.663 | 0.632 | 3.66E-02 breast carcinoma amplified sequence 1                        |
| <i>C130074G19</i> | -0.522 | 0.696 | 3.25E-02 RIKEN cDNA C130074G19 gene                                   |
| <i>Fam102b</i>    | -0.688 | 0.621 | 1.04E-03 family with sequence similarity 102, member B]               |
| <i>Fam114a1</i>   | -0.554 | 0.681 | 4.41E-02 family with sequence similarity 114, member A1               |
| <i>Fam171b</i>    | -0.759 | 0.591 | 1.58E-02 family with sequence similarity 171, member B                |
| <i>Gm10093</i>    | -0.809 | 0.571 | 2.36E-02 histone deacetylase 1 pseudogene                             |
| <i>H19</i>        | -0.825 | 0.565 | 2.04E-04 H19, imprinted maternally expressed transcript (ncRNA)       |
| <i>Snhg18</i>     | -0.615 | 0.653 | 4.61E-02 small nucleolar RNA host gene 18 (ncRNA)                     |
| <i>Zeb2os</i>     | -0.805 | 0.573 | 4.55E-03 inc finger E-box binding homeobox 2, opposite strand (ncRNA) |

**Genes with function described in other cell types**

|              |        |       |                                                         |
|--------------|--------|-------|---------------------------------------------------------|
| <i>Gap43</i> | -0.917 | 0.529 | 1.58E-03 growth associated protein 43                   |
| <i>Kcnk2</i> | -0.757 | 0.592 | 2.13E-02 potassium channel, subfamily K, member 2       |
| <i>Nbl1</i>  | -0.724 | 0.606 | 1.76E-02 neuroblastoma, suppression of tumorigenicity 1 |
| <i>Net1</i>  | -0.781 | 0.582 | 1.42E-03 neuroepithelial cell transforming gene 1       |
| <i>Nov</i>   | -0.859 | 0.551 | 1.77E-03 nephroblastoma overexpressed gene              |
| <i>Nrep</i>  | -0.517 | 0.699 | 3.95E-02 neuronal regeneration related protein          |
| <i>Ogn</i>   | -0.702 | 0.615 | 2.08E-03 osteoglycin                                    |
| <i>Plp1</i>  | -0.579 | 0.669 | 8.66E-03 proteolipid protein (myelin) 1                 |
| <i>Sbsn</i>  | -0.727 | 0.604 | 3.65E-02 suprabasin                                     |
| <i>Sgms2</i> | -0.650 | 0.637 | 2.34E-02 sphingomyelin synthase 2                       |

| GOTERM_BP_DIRECT                         | Down regulated genes in the inguinal subcutaneous adipose tissue of 2-week-old <i>Egr1</i> <sup>-/-</sup> mice |                                                                                                                                                                                                                                                                                                                                                                                                                                                                                                          |
|------------------------------------------|----------------------------------------------------------------------------------------------------------------|----------------------------------------------------------------------------------------------------------------------------------------------------------------------------------------------------------------------------------------------------------------------------------------------------------------------------------------------------------------------------------------------------------------------------------------------------------------------------------------------------------|
|                                          | Enrichment scores / P-values                                                                                   | Genes                                                                                                                                                                                                                                                                                                                                                                                                                                                                                                    |
| <b>Collagen fibril organization</b>      | <b>23.8/ 2.4<sup>E</sup>-10</b>                                                                                | <i>Adamts2</i> a disintegrin-like and metallopeptidase (reprolysin type) with thrombospondin type 1 motif, 2<br><i>Colla1</i> collagen, type I, alpha 1<br><i>Colla2</i> collagen, type I, alpha 2<br><i>Col3a1</i> collagen, type III, alpha 1<br><i>Col5a2</i> collagen, type V, alpha 2<br><i>Coll4a1</i> collagen, type XIV, alpha 1<br><i>Dpt</i> dermatopontin<br><i>Ddr2</i> discoidin domain receptor family, member 2<br><i>Lum</i> lumican<br><i>Sfrp2</i> secreted frizzled-related protein 2 |
| <b>Collagen catabolic process</b>        | <b>21.1/ 8<sup>E</sup>-5</b>                                                                                   | <i>Adamts2</i> a disintegrin-like and metallopeptidase (reprolysin type) with thrombospondin type 1 motif, 2<br><i>Ctsk</i> cathepsin K<br><i>Mrc2</i> mannose receptor, C type 2<br><i>Mmp14</i> matrix metallopeptidase 14<br><i>Mmp2</i> matrix metallopeptidase 2                                                                                                                                                                                                                                    |
| <b>Extracellular matrix organization</b> | <b>6.7/ 6.1<sup>E</sup>-4</b>                                                                                  | <i>Adamts14</i> ADAMTS-like 4<br><i>Smoc1</i> SPARC related modular calcium binding 1<br><i>Ccdc80</i> coiled-coil domain containing 80<br><i>Ecm2</i> extracellular matrix protein 2, female organ and adipocyte specific<br><i fn1<="" i=""> fibronectin 1<br/><i>Olfml2b</i> olfactomedin-like 2B<br/><i>Postn</i> periostin</i>                                                                                                                                                                      |
| <b>Ossification</b>                      | <b>6.5/ 2.2<sup>E</sup>-3</b>                                                                                  | <i>Bmp3</i> bone morphogenetic protein 3<br><i>Chrd11</i> chordin-like 1<br><i>Ddr2</i> discoidin domain receptor family, member 2<br><i>Igf2</i> insulin-like growth factor 2                                                                                                                                                                                                                                                                                                                           |

|                                            |                          |                                                                                                                                                                                                                                                                                                                                                                                                                                                                                                                                                                                                                                                   |
|--------------------------------------------|--------------------------|---------------------------------------------------------------------------------------------------------------------------------------------------------------------------------------------------------------------------------------------------------------------------------------------------------------------------------------------------------------------------------------------------------------------------------------------------------------------------------------------------------------------------------------------------------------------------------------------------------------------------------------------------|
|                                            |                          | <i>Lrrc17</i> leucine rich repeat containing 17<br><i>Mmp14</i> matrix metalloproteinase 14                                                                                                                                                                                                                                                                                                                                                                                                                                                                                                                                                       |
| <b>Wound healing</b>                       | 5.6/ 3.4 <sup>E</sup> -2 | <i>Coll1a1</i> collagen, type I, alpha 1<br><i>Col3a1</i> collagen, type III, alpha 1<br><i>Fgf2</i> fibroblast growth factor 2<br><i>Fnl</i> fibronectin 1                                                                                                                                                                                                                                                                                                                                                                                                                                                                                       |
| <b>Positive regulation of MAPK cascade</b> | 4.5/ 2.6 <sup>E</sup> -2 | <i>Igf1</i> insulin-like growth factor 1<br><i>Igf2</i> insulin-like growth factor 2<br><i>Lep</i> leptin<br><i>Lpar1</i> lysophosphatidic acid receptor 1<br><i>Timp2</i> tissue inhibitor of metalloproteinase 2                                                                                                                                                                                                                                                                                                                                                                                                                                |
| <b>Cell adhesion</b>                       | 3.2/ 1.6 <sup>E</sup> -4 | <i>Cd34</i> CD34 antigen<br><i>Alcam</i> activated leukocyte cell adhesion molecule<br><i>Cdh11</i> cadherin 11<br><i>Col14a1</i> collagen, type XIV, alpha 1<br><i>Dpt</i> dermatopontin<br><i>Emilin2</i> elastin microfibril interfacier 2<br><i>Fap</i> fibroblast activation protein<br><i>Fnl</i> fibronectin 1<br><i>Mfap4</i> microfibrillar-associated protein 4<br><i>Nov</i> neuroblastoma overexpressed gene<br><i>Postn</i> periostin<br><i>Pcdh20</i> protocadherin 20<br><i>Pcdhb14</i> protocadherin beta 14<br><i>Srpx2</i> sushi-repeat-containing protein, X-linked 2<br><i>Thbs3</i> thrombospondin 3<br><i>Vcan</i> versican |

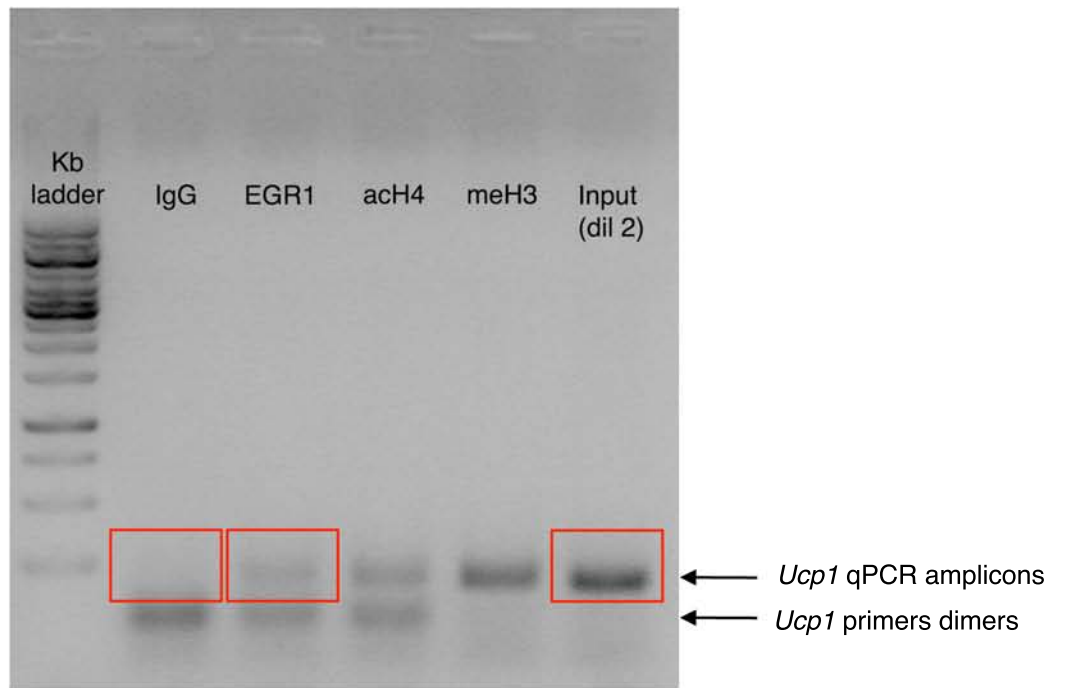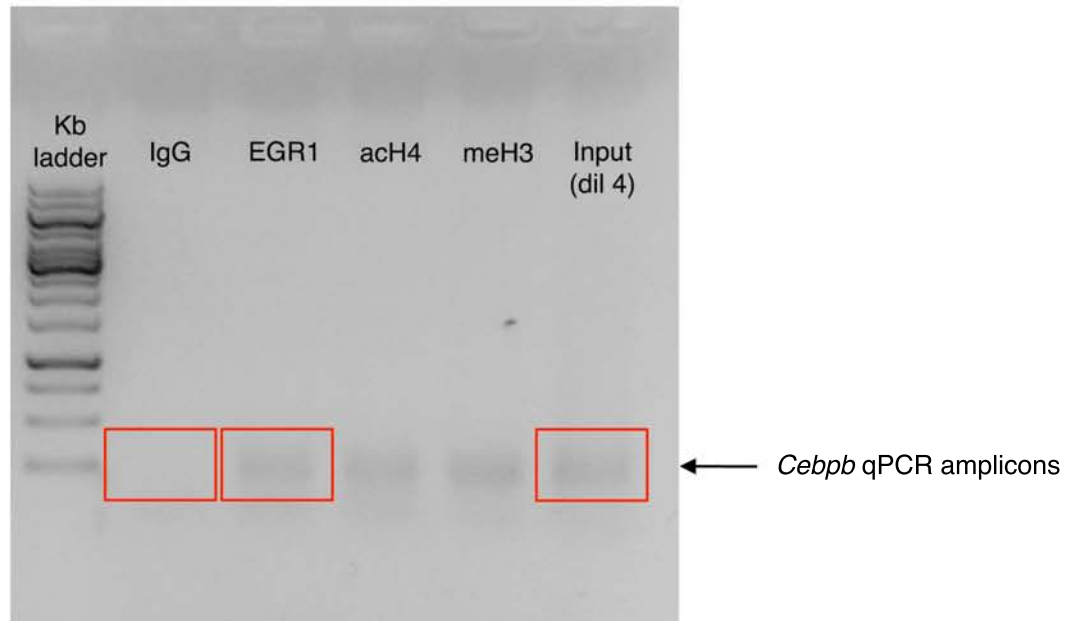

**A**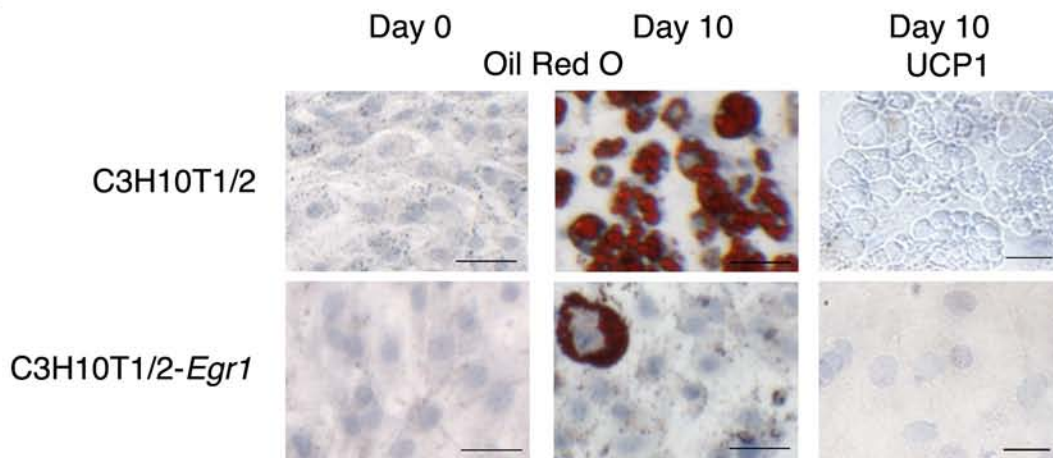**B**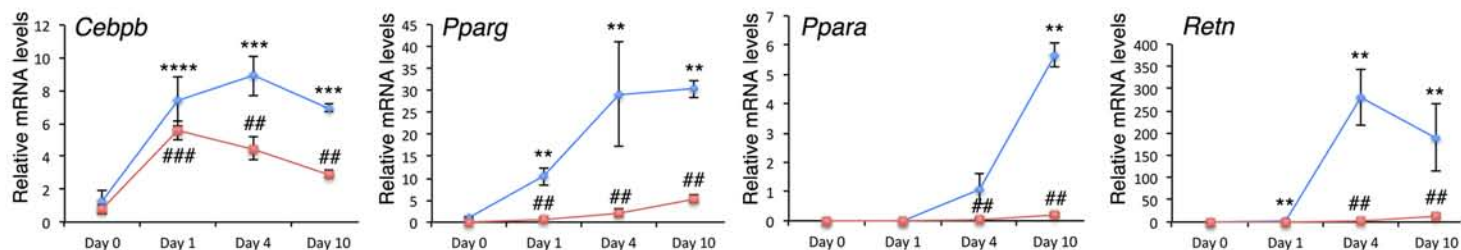**C**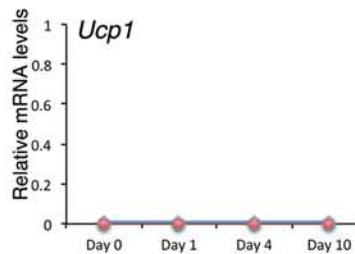**D**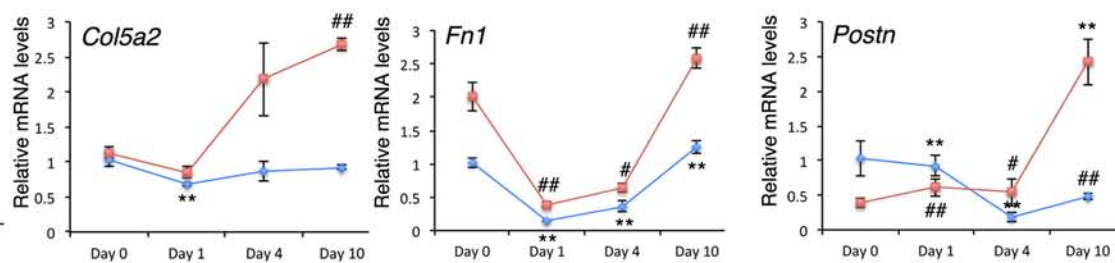

| For RT-qPCR analysis |                               |                              |
|----------------------|-------------------------------|------------------------------|
| Gene name            | Forward Primer                | Reverse Primer               |
| <i>Cebpb</i>         | 5'- CGCCTTTAGACCCATGGAAG      | 5'- AGGCAGTCGGGCTCGTAGTAG    |
| <i>Ppara</i>         | 5'-AACATCGAGTGTCTGAATATGTGG   | 5'- CCGAATAGTTCGCCGAAAGAA    |
| <i>Pparg</i>         | 5'- TCGGTGATGCACTGCCTATG      | 5'- GAGAGGTCCACAGAGCTGATT    |
| <i>Ppargc1a</i>      | 5'- TGGACGGAAGCAATTTTTCA      | 5'- TTACCTGCGCAAGCTTCTCT     |
| <i>Dio2</i>          | 5'- CTTCTCTACCACCACCTTC       | 5'- CATCTTCACCCAGTTTAACC     |
| <i>Pank1</i>         | 5'- GTTCGCCCAGCATGATTCTC      | 5'- CTTAACCAGGGTTCCACCGAT    |
| <i>Cidea</i>         | 5'- ACTTCCTCGGCTGTCTCAATGTCA  | 5'- TCAGCAGATTCCCTAACACGGCCT |
| <i>Ucp1</i>          | 5'- GGGCATTTCAGAGGCAAATCAGCTT | 5'- ACACTGCCACACCTCCAGTCATTA |
| <i>Cox8b</i>         | 5'- AGCCAAAACCTCCCACTTCC      | 5'- TCTCAGGGATGTGCAACTTC     |
| <i>Plin5</i>         | 5'- CAGAGCAAACACCGTACCCAG     | 5'- GGGATGGAAAGTAGGGCTAGG    |
| <i>Ogdh</i>          | 5'- TATGGCCTACACGAGTCTGAC     | 5'- CCAGCCGACGGATGATCTCA     |
| <i>Sucla2</i>        | 5'- ACCCTTTCGCTGCATGAATAC     | 5'- CTGTGCCTTTATCACAACATCCT  |
| <i>Col1a1</i>        | 5'- TGGAGAGAGCATGACCGAT       | 5'- GAGCCCTCGCTTCCGTA        |
| <i>Col5a2</i>        | 5'- ACAGGTGAAGTGGGATTCTCA     | 5'- CCATAGCACCCATTGGACCA     |
| <i>Col14a1</i>       | 5'- TGGAGTATTGGGAGGTTCAACT    | 5'- TGCCACTCTATTCTGGGGTCC    |
| <i>Fn1</i>           | 5'- CACGTACCTCTTCAAAGTCTTTG   | 5'- GGATTGCTTTCCTGCCT        |

|                                |                              |                               |
|--------------------------------|------------------------------|-------------------------------|
| <i>Postn</i>                   | 5'- TGGTATCAAGGTGCTATCTGCG   | 5'- AATGCCAGCGTGCCATAAA       |
| <i>Dcn</i>                     | 5'- CTATGTGCCCTACCGATGC      | 5'- CAGAACATGCACCACTCGAAG     |
| <i>Mmp2</i>                    | 5'- CAAGTTCCCCGGCGATGTC      | 5'- TTCTGGTCAAGGTCACCTGTC     |
| <i>Retn</i>                    | 5'- GCCATCGACAAGAAGATCAA     | 5'- CTCCTCTGGAGGAGACTG        |
| <i><math>\beta</math>actin</i> | 5'- GATCTGGCACCACACCTTCT     | 5'- GGGGTGTTGAAGGTCTCAA       |
| <i>Rplp0</i>                   | 5'- ACCTCCTTCTTCCAGGCTTT     | 5'- CTCCCACCTTGTCTCCAGTC      |
| <b>For ChIP-qPCR analysis</b>  |                              |                               |
| <b>Promoter name</b>           | <b>Forward Primer</b>        | <b>Reverse Primer</b>         |
| <i>Cebpb</i>                   | 5'- GAGGGAAGCTCAGAAGCAAAGT   | 5'- AGCCCTCCACCTATGTAT        |
| <i>Ppargc1a</i>                | 5'- GCCTATGAGATCCACGGAAAG    | 5'- GTCTCCTGGCAGTAGAGAATG     |
| <i>Ucp1</i>                    | 5'- TGTGGCCAGGGCTTGGGAGT     | 5'- AGATTGCCCGGCACTTCTGCG     |
| <i>Gapdh</i>                   | 5'- CAGGAGCCAGGGAAGATACAAATA | 5'- ACGCATACACATATACAACCAGTCA |



## Supplementary Figure legends

**Supplementary Figure 1. Cell proliferation in *Egr1<sup>+/+</sup>* and *Egr1<sup>-/-</sup>* mice.** SC-WATs of 1-month-old (A,B,C) and 4-months-old (D,E) *Egr1<sup>+/+</sup>* and *Egr1<sup>-/-</sup>* mice were sectioned transversely and immuno-stained with KI67 (red). Nuclei were visualized with DAPI (blue). Individual channel or merged channels are indicated in each panel. (A) Ki67+ cells were visualized in vessels of SC-WATs of 1-month-old *Egr1<sup>+/+</sup>* mice. Ki67+ cells were barely observed in SC-WATs of 1 and 4 month *Egr1<sup>+/+</sup>* mice, as in SC-WATs of 1 and 4-month-old *Egr1<sup>-/-</sup>* mice. These results indicate that proliferation is not modified in SC-WATs of *Egr1<sup>-/-</sup>* mice at 1 and 4 months of age compared to control mice. Scale bars in A,B,C and D, 50  $\mu$ m.

**Supplementary Figure 2. SC-WAT browning in heterozygous *Egr1<sup>+/-</sup>* mice.** (A) SC-WATs of 4-month-old *Egr1<sup>+/+</sup>*, *Egr1<sup>+/-</sup>* and *Egr1<sup>-/-</sup>* mice were sectioned and immuno-stained with UCP1 antibody. Nuclei were visualized with DAPI. Phase, individual or merged channels are indicated in each panels. *Egr1<sup>+/-</sup>* mice exhibit an intermediate browning of their SC-WAT compared to *Egr1<sup>+/+</sup>* and *Egr1<sup>-/-</sup>* mice. (B) White and beige adipocyte number was counted in arbitrary unit areas of transverse sections of SC-WAT of 4 month-old *Egr1<sup>+/+</sup>* (N=13) and *Egr1<sup>+/-</sup>* (N=8) mice. Graphs show means of sections for each sample  $\pm$  standard deviations. Asterisks indicate the p-values obtained using the Mann-Whitney test, comparing beige or white adipocyte number between mutant and control mice \* P<0.05, \*\*P<0.01. (C) Cell number in SC-WAT in *Egr1<sup>+/+</sup>* and *Egr1<sup>+/-</sup>* mice. Number of nuclei (DAPI-positive cells) was counted in arbitrary unit areas of transverse sections of SC-WAT of 4 month-old *Egr1<sup>+/+</sup>* (N=11) and *Egr1<sup>+/-</sup>* (N=8) mice. Graphs show means of sections for each sample  $\pm$  standard deviations. Asterisks indicate the p-values obtained using the Mann-Whitney test, comparing beige or white adipocyte number between mutant and control mice \* P<0.05.

**Supplementary Figure 3.** List of upregulated genes in the inguinal subcutaneous adipose tissue of 2-week-old *Egr1<sup>-/-</sup>* mice versus wild-type mice.

**Supplementary Figure 4.** Gene Ontology analysis of the upregulated genes in the inguinal subcutaneous adipose tissue of *Egr1<sup>+/+</sup>* versus *Egr1<sup>-/-</sup>* 2-week-old mice using the DAVID Bioinformatics Resources 6.8.

**Supplementary Figure 5.** List of downregulated genes in the inguinal subcutaneous adipose tissue of 2-week-old *Egr1*<sup>-/-</sup> mice versus wild-type mice.

**Supplementary Figure 6.** Gene Ontology analysis of downregulated genes in the inguinal subcutaneous adipose tissue of *Egr1*<sup>+/+</sup> versus *Egr1*<sup>-/-</sup> 2-week-old mice using the DAVID Bioinformatics Resources 6.8.

**Supplementary Figure 7.** Full scan of the gels used in Figure 3E. Boxed regions correspond to the bands used in the Figure 3E.

**Supplementary Figure 8. *Egr1* gain-of-function decreases white adipose tissue differentiation in mouse mesenchymal stem cells.** (A) C3H10T1/2 and C3H10T1/2-*Egr1* cells subjected to white adipocyte differentiation for 10 days were stained with Oil Red O and Hematoxylin/Eosin at Day 0 (confluence) and Day 10, or immuno-stained with UCP1 antibody and counterstained with Hematoxylin/Eosin at Day 10. UCP1 was never expressed in cells cultured in white adipocyte differentiation medium. Scale bars: Oil red O staining 50  $\mu$ m, UCP1 immunostaining 25  $\mu$ m. (B-D) RT-qPCR analysis of the expression levels for the generic adipocyte differentiation genes *Cebpb*, *Pparg*, *Ppara*, the white differentiation marker *Retn* (B), the thermogenic marker *Ucp1* (C), the extracellular matrix genes *Col5a2*, *Fnl* and *Postn* (D), in C3H10T1/2 and C3H10T1/2-*Egr1* cells subjected to 10 days of white adipocyte differentiation conditions. *Egr1* repressed the expression of *Cebpb*, *Pparg*, *Ppara* and *Retn*, involved in the white adipocyte differentiation program and activated the expression of ECM genes, *Col5a2*, *Fnl* and *Postn* during white adipocyte differentiation. *Ucp1* expression was not detected in cells cultured in white differentiation conditions. For each time point, graphs show means  $\pm$  standard deviations of 6 samples. The p values were calculated using the Mann-Whitney test. The relative mRNA levels were calculated using the  $2^{-\Delta\Delta Ct}$  method. Asterisks indicate the p-values of gene expression levels in C3H10T1/2-*Egr1* cells or C3H10T1/2 cells compared to Day 0 (*Cebpb*, *Pparg*, *Col5a2*, *Fnl* and *Postn*) or from the first day of gene detection (*Ppara* and *Retn*), \*\*P<0.01, \*\*\*P<0,001, \*\*\*\*P<0,0001. # indicate the p-values of gene expression levels in C3H10T1/2-*Egr1* versus C3H10T1/2 cells, for each time point,; # P<0.05, ## P<0.01, ### P<0.001

**Supplementary Table 1.** List of primers used for quantitative PCR.
